# Supplementary material
Source: HighWire-hosted journal article supplement (http://thorax.bmjjournals.com/highwire/filestream/174093/field_highwire_adjunct_files/3/633259webonlyapp4.pdf)

# Figure S3

## A

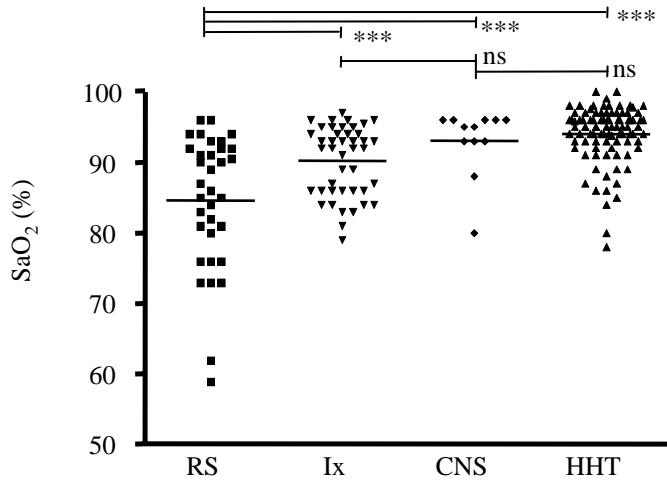

## B

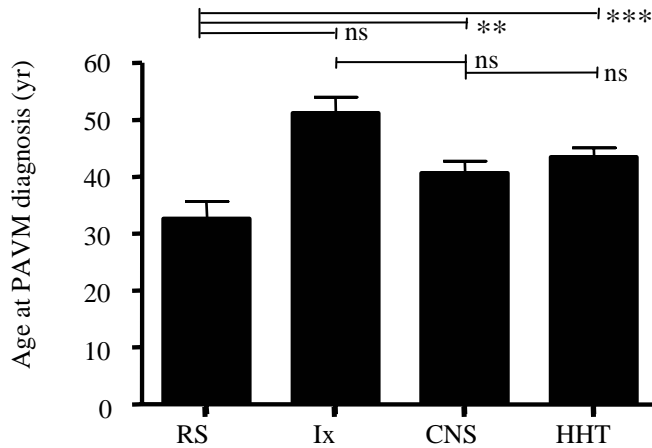

## C

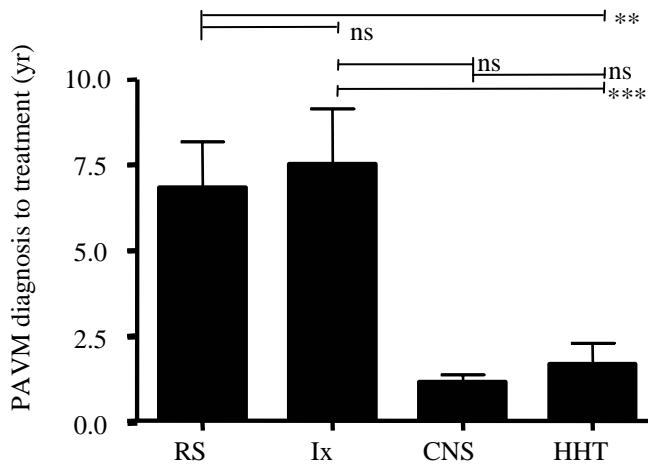

Supplement: 633259webonlyapp4.pdf [file 633259webonlyapp4.pdf]
